# Supplementary material for: Sustainable and Scalable Approach for Enhancing the Electrochemical Performance of Molybdenum Disulfide (MoS2)
Source: Hindawi journal article supplement (doi:10.1155/2022/1288623), 2022-12-31
Supplement: f1 [file 1288623.f1.docx]

***Electrochemical analysis****:* The type of capacitive contribution and kinetics of the BL-MoS2 electrode are studied using Dunn's equation. We used cyclic voltammetry (CV) to study the electrode kinetics at very low scan rates of 0.1, 0.5, 1, 5 and 10 mV/s so that we can deeply explore the surface and diffusion regulated capacitance. The CV curves are then recorded at different scan rates as depicted in Fig. 1(a). The charge storage process in BL-MoS2 are result of the double layer capacitance and faradaic reactions. The absence of distinct redox peaks in the CV curves may be caused by intercalation and de-intercalation of the K+ ions in the BL-MoS2, which serves as the key contributor to the system's pseudocapacitance [1].

**(a)**

**(b)**

Figure.1 (a) CV plot of BL-MoS2 (b) the log (I) and log (𝜈) plot of the BL-MoS2 electrode.

The capacitance contribution was computed by CV to show the reaction kinetics of the prepared BL-MoS2 electrode material. An electrochemical process with diffusion control and a surface-controlled capacitive process are two mechanisms, can work together to build the total capacity of the electrode material. Diffusion control is mostly driven by electrochemical reaction occurring inside the electroactive material, while the surface-controlled capacitive process is caused primarily by ion adsorption and rapid electrochemical interaction occurring near the electrode surface. Power law was used to estimate the contribution level of capacitance, as illustrated in the formula below.

(1)

Where I stand for current, 𝜈 for scan rate, a and b are arbitrary constants.

The value of b for the diffusion control process and the surface control process are roughly 0.5 and 1 respectively [2]. Using power law, the experimental current I is plotted against the scan rate (𝜈) to obtain the slope of the log(I) versus log(𝜈) plot of the BL-MoS2 electrode (Fig.1 (b)). The slope of this plot gives us the value of b. Here, we find out that the slope came out to be b 0.55, indicating that the faradaic process contributed as the main mechanism for charge storage in BL-MoS2 electrode (Fig.1 (b)). The peak currents of BL-MoS2 electrodes nearly varies with square root of scan rate, indicating that the electrochemical process was attributed to a diffusion control process.

***Calculation of Specific Capacitance:*** The specific capacitance was calculated using the Galvanostatic Charge-Discharge (GCD) technique.

Csp = (2)

where Csp, I, t, m, and ΔV represents their usual meanings, i.e., the Specific Capacitance (F/g), Discharge current (A), Time duration of discharging (s), Mass deposited on the electrode (g), Potential window (∆V) respectively.

**Table.1 Specific Capacitance calculation for BM-MoS2**

| Sr. No. | Current applied to the cell (during GCD experiment) | Discharge Time  (∆t in second) | Current Density (A/g) | Specific Capacitance Calculated (Farad/gram)  Csp = |
| --- | --- | --- | --- | --- |
| 1 | 1.39 mA | 160 | 1 | 114 |
| 2 | 2.10 mA | 84 | 1.5 | 91 |
| 3 | 2.80 mA | 58 | 2 | 82.8 |
| 4 | 3.50 mA | 42 | 2.5 | 75 |
| 5 | 4.20 mA | 31 | 3 | 66 |

Also for capacitance calculation we used mass deposited on electrode (m = 1.39 mg) and Potential window in GCD (∆V = 1.4 V [0.7-(-0.7)]. In a similar way we have also calculated the specific capacitance for BL-MoS2.

**References**

[1] P. Tiwari, J. Jaiswal, and R. Chandra, “Hierarchal growth of MoS2@ CNT heterostructure for all solid state symmetric supercapacitor: Insights into the surface science and storage mechanism,” *Electrochimica Acta*, 324, 134767, 2019.

[2] V.K. Mariappan, K. Krishnamoorthy, P. Pazhamalai, et al., “Antimonene dendritic nanostructures: Dual-functional material for high-performance energy storage and harvesting devices,” *Nano Energy*, 77, 105248, 2020.
